# Supplementary material for: Variation in minimum desired cardiovascular disease-free longevity benefit from statin and antihypertensive medications: a cross-sectional study of patient and primary care physician perspectives
Source: PubMed Central journal article supplement — BMJ Open. 2018 May 26;8(5):e021309. doi: 10.1136/bmjopen-2017-021309 (PMC5988148; doi:10.1136/bmjopen-2017-021309), 2018-05-26
Supplement: bmjopen-2017-021309supp001.pdf [file bmjopen-2017-021309supp001.pdf]

1 **SUPPLEMENTAL MATERIAL**

2

3 A) Physician Survey .....2

4 B) Patient Survey .....5

5 C) Short Summary of Introduction Sessions.....8

6 D) Values Used for Calculations .....11

7 E) Example Calculation.....12

8 F) Supplemental Figures .....13

9

10

11

12

13

14

15

16

17

18

19

20

21 **A) Physician Survey**

22 *The following survey was conducted on December 8<sup>th</sup>, 2016 at the Boerhaave Continuing Medical*  
23 *Education Conference.*

24 1. What is your current position?

- 25 a. Family Physician
- 26 b. Nursing home physician
- 27 c. Physician for mentally impaired
- 28 d. Resident Family Medicine
- 29 e. Nurse practitioner/ Nursing assistant
- 30 f. Other

31 *\*Note: Answers a, b, and c, are considered specialties in primary prevention*

32 2. What is your gender?

- 33 a. Male
- 34 b. Female

35 3. What is your age?

- 36 a.  $\leq 34$
- 37 b. 35-45
- 38 c. 46-52
- 39 d. 53-57
- 40 e. 58-62
- 41 f. 63-67
- 42 g. 68-72
- 43 h.  $\geq 72$

- 44 4. Imagine **you** were considering starting (or continuing) a statin medication **for yourself**. What is  
45 the minimum gain in life-expectancy without (new) cardiovascular disease “*healthy life years*”  
46 the medication must provide before you considered use worthwhile?
- 47 a. ½ year (low threshold)  
48 b. 1 year  
49 c. 1 ½ year  
50 d. 2 year  
51 e. 2 ½ year  
52 f. 3 year  
53 g. 3 ½ year (high threshold)  
54 h. I would never want to use a statin *Or only above these thresholds*  
55
- 56 5. Imagine you were to gain **1 year** of life-expectancy without (new) cardiovascular disease  
57 “*healthy life years.*” What is the **maximum** number of years you would personally consider using  
58 this statin to achieve this benefit?
- 59 a. I would never want to use a statin; *Or only above these thresholds*  
60 b. 5 year (high threshold)  
61 c. 10 year  
62 d. 15 year  
63 e. 20 year  
64 f. 30 year  
65 g. 40 year  
66 h. 50 year (low threshold)  
67  
68

- 69 6. What is the **minimum** gain in life-expectancy without (new) cardiovascular disease, “*healthy life*  
70 *years*”, necessary before you consider **10 years of statin therapy** for a **patient** worthwhile?
- 71 a. 2 months (low threshold)
- 72 b. 4 months
- 73 c. 6 months
- 74 d. 8 months
- 75 e. 10 months
- 76 f. 12 months
- 77 g. 14 months (high threshold)
- 78 h. I would never consider statin prescription worthwhile. *Or only above these thresholds*  
79
- 80 7. And what we aren’t talking about statins, but about blood-pressure therapy?
- 81 What is the **minimum** gain in life-expectancy without (new) cardiovascular disease, “*healthy life*  
82 *years*”, necessary before you consider **10 years of blood-pressure therapy** for a **patient**  
83 worthwhile?
- 84 a. 2 months (low threshold)
- 85 b. 4 months
- 86 c. 6 months
- 87 d. 8 months
- 88 e. 10 months
- 89 f. 12 months
- 90 g. 14 months (high threshold)
- 91 h. I would never consider blood-pressure medication prescription worthwhile; *Or only above*  
92 *these thresholds*  
93

94 **B) Patient Survey**

95 *The following patient survey was conducted on April 7th, 2017 at the University Medical Centre*

96 *Utrecht, the Netherlands.*

97 1. Do you use a statin?

98 a. Yes

99 b. No

100 c. I have used statins, but stopped taking them

101 d. I don't know

102 2. Do you use an antihypertensive medication?

103 a. Yes

104 b. No

105 c. I have used antihypertensive medications, but stopped taking them

106 d. I don't know

107 3. What is your gender?

108 a. Male

109 b. Female

110 4. What is your age?

111 .....years

112 5. Please mark all the complications or medication procedures which you have had. You can also  
113 indicate if you have never had any one of these procedures.

114  Heart attack

115  Stroke

116  *Intermittent claudication* (Peripheral artery disease)

117  TIA

- 118            a stent, angioplasty, or other operation of the hart
- 119            an operation of the carotid artery (*major artery of the neck*)
- 120            I have never had *ANY* of the above

121 5. Imagine **you** were considering starting (or continuing) a statin medication. What in the minimum  
122 gain in life-expectancy without (new) cardiovascular disease "*healthy life years*" the medication  
123 must provide before you considered use worthwhile?

- 124 a. ½ year (low threshold)
- 125 b. 1 year
- 126 c. 1 ½ year
- 127 d. 2 year
- 128 e. 2 ½ year
- 129 f. 3 year
- 130 g. 3 ½ year (high threshold)
- 131 h. I would never want to use a statin ; *Or only above these thresholds*

132

133 6. Imagine you were to gain **1 year** of life-expectancy without (new) cardiovascular disease  
134 "*healthy life years.*" What is the **maximum** number of years you would consider using the statin  
135 to achieve this benefit?

- 136 a. I would never consider a statin worthwhile; *Or only above these thresholds*
- 137 b. 5 years (high threshold)
- 138 c. 10 years
- 139 d. 15 years
- 140 e. 20 years
- 141 f. 30 years
- 142 g. 40 years
- 143 h. 50 years (low threshold)

144 7. What is the minimum gain in life-expectancy without (new) cardiovascular disease,  
145 “*healthy life years*”, necessary before you consider 10 years of statin therapy  
146 worthwhile?

147

148 a. 2 months (low threshold)

149 b. 4 months

150 c. 6 months

151 d. 8 months

152 e. 10 months

153 f. 12 months

154 g. 14 months (high threshold)

155 h. I would never consider a statin worthwhile; *Or only above these thresholds*

156

157 8. And what we aren’t talking about statins, but about blood-pressure therapy?

158 What is the **minimum** gain in life-expectancy without (new) cardiovascular disease, “*healthy life*  
159 *years*”, necessary before you consider **10 years of blood-pressure therapy** worthwhile?

160 a. 2 months (low threshold)

161 b. 4 months

162 c. 6 months

163 d. 8 months

164 e. 10 months

165 f. 12 months

166 g. 14 months (high threshold)

167 h. I would never consider blood-pressure medication worthwhile ; *Or only above these*  
168 *thresholds*

169

## 170 C) Short Summary of Introduction Sessions

171

### 172 Physician Session

173

174 • The session started with a short reiteration that prevention of cardiovascular disease (CVD)

175 incorporates both life-style aspects (such as not smoking or drinking too much alcohol,

176 exercising regularly, eating healthy) and medication aspects (such as cholesterol, blood-

177 pressure and aspirin treatment).

178 • Decision-making cardiovascular disease prevention was described as finding the balance

179 between the benefits (living a longer, healthier, life) and negative effects (side-effects, costs,

180 and taking a pill daily) of therapy. For each individual person, the balance between the

181 benefits and negative effects can be different.

182 • The SCORE-chart as used in national primary prevention guidelines was reviewed.

183 Drawbacks of using the SCORE-chart, and the associated ten-year absolute risk was

184 discussed, namely that it often emphasizes treatment of the elderly, and that interpretation

185 of 10-year risk or risk reduction may be difficult for the patient. Positive aspects of the

186 SCORE-chart were also discussed, namely that it is easy to use, and allows for a variety of

187 different individual risk-factors to be combined.

188 • Prediction algorithms and calculators which can estimate CVD-free life-expectancy for those

189 in the primary prevention were introduced (i.e. the JBS-3 risk score).<sup>22</sup> Life-time estimates

190 were described as being more biologically and clinically intuitive, as atherosclerosis is a

191 phenomenon which starts early in life, and manifests itself only after a few decades.

192 • It was illustrated with two examples from peer-reviewed literature that the one “treats” a

193 risk-factor, the greater the potential benefit. The first example provided was meant to show

194 a large life-time benefit from a life-style intervention. It was shown that stopping with

195 smoking between 25-34 years of age extends survival by 10 years, whereas stopping

196 between 55-64 years of age extends survival by 3 years.<sup>18</sup> The second example was meant to



197 show a small benefit, and to provide a reference for preventative medication.<sup>1</sup> It was shown  
198 that the individual effect of aspirin therapy, is not expressed in years, but rather in months  
199 gain. These months range between 0-8 according to peer reviewed literature. It was  
200 emphasized that the potential gain in stopping with smoking is of a greater magnitude than  
201 the potential gain of medication, which is better represented by the aspirin example. It was  
202 also emphasized that the longer one “treats” a risk-factor, the longer one must also take the  
203 medication.

- 204 • Long-term validation results of these prediction models were shown.<sup>1</sup>
- 205 • In conclusion, it was iterated that starting medication at a young age provides the greatest  
206 net effect of therapy, but that this greater net-effect also goes hand in hand with a longer  
207 period of time in which the therapy would have to be used.

208

## 209 **Patient Session**

- 210 • The session started with a short reiteration that prevention of cardiovascular disease (CVD)  
211 incorporates both life-style aspects (such as not smoking or drinking too much alcohol,  
212 exercising regularly, eating healthy) and medication aspects (such as cholesterol, blood-  
213 pressure and aspirin treatment).
- 214 • Lipid-lowering and blood-pressure lowering were described as two important pillars of CVD-  
215 prevention guidelines. Statin medication were described as some on the most common  
216 cholesterol-lowering drugs, and a number of statin medications (with both generic and  
217 brand-names) were given: simvastatin, rosuvastatin, pravastatin, atorvastatin, fluvastatin. A  
218 few common examples of blood-pressure lowering medications were also given:  
219 hydrochlorothiazide, enalapril, perindopril, losartan, olmesartan, amlodipine, and  
220 metoprolol.
- 221 • Decision-making cardiovascular disease prevention was described as finding the balance  
222 between the benefits (living a longer, healthier, life) and negative effects (side-effects, costs,

223 and taking a pill daily) of therapy. For each individual person, the balance between the  
224 benefits and negative effects can be different.

225 • What exactly “CVD-free life expectancy?” entails was discussed. It was described as the  
226 amount of time you can expect to live *healthily*, without cardiovascular disease. If you  
227 already have had cardiovascular disease, then it was described as the amount of time you  
228 can expect to live without having another major cardiovascular event, such as a heart-  
229 attack. It was discussed that doctors are getting better at predicting what someone’s CVD-  
230 free life-expectancy is, and also what the gain in CVD-free life expectancy is from  
231 medications such as statin and blood-pressure lowering medications.

232 • It was introduced that the longer one “treats” a risk-factor, the greater the benefit (gain in  
233 CVD-free life-expectancy can be). This was illustrated with the same two-examples from  
234 peer-reviewed literature as with the physicians. Likewise, it was emphasized that the  
235 potential gain in stopping with smoking is of a greater magnitude than the potential gain of  
236 medication, which is better represented by the aspirin example. It was also emphasized that  
237 the longer one “treats” a risk-factor, the longer one must also take the medication.

238 • In conclusion, it was iterated that starting medication at a young age provides the greatest  
239 net effect of therapy, but that this greater net-effect also goes hand in hand with a longer  
240 period of time in which the therapy would have to be used. The definition of CVD-free life-  
241 expectancy was given again.

242

243

244

245 **D) Values Used for Calculations**

246 Age and gender-specific medians (50<sup>th</sup> percentile) of high-density lipoprotein concentration (HDL-c,  
 247 mmol/l) and triglyceride concentration (TG, mmol/l), were used to calculate low-density lipoprotein  
 248 concentration (LDL-c, mmol/l).<sup>27-29</sup> For each lipid-value depicted on the SCORE-based chart,  
 249 corresponding low-density lipoprotein concentration (LDL-c) was calculated using the Friedewald  
 250 formula and age and sex-specific medians of high density lipoprotein (HDL-c) and triglyceride  
 251 concentrations. Age and gender-specific body-mass index (BMI, kg/m<sup>2</sup>) was used with Joint British  
 252 Societies for prevention of cardiovascular disease (JBS3) risk calculator<sup>22</sup>. Patients were assumed to  
 253 have average socio-economic status and have no other comorbidities such as diabetes. Smokers  
 254 used between 10 and 20 cigarettes per day.

255 **Supplemental Table 1: Lipid levels used for calculation of therapy effects**

|                | Age   | HDL-c, mmol/l | TG, mmol/l | BMI, kg/m <sup>2</sup> |
|----------------|-------|---------------|------------|------------------------|
| <b>Males</b>   | 40-49 | 1.12          | 1.35       | 26.2                   |
|                | 50-54 | 1.14          | 1.41       | 26.5                   |
|                | 55-59 | 1.20          | 1.29       | 26.5                   |
|                | 60-64 | 1.27          | 1.22       | 26.8                   |
|                | 65-69 | 1.27          | 1.19       | 26.8                   |
|                | > 70  | 1.25          | 5.56       | 26.2                   |
| <b>Females</b> | 40-49 | 1.46          | 0.75       | 24.7                   |
|                | 50-54 | 1.61          | 1.13       | 25.7                   |
|                | 55-59 | 1.56          | 1.22       | 25.7                   |
|                | 60-64 | 1.59          | 1.16       | 26.4                   |
|                | 65-69 | 1.61          | 1.30       | 26.4                   |
|                | > 70  | 1.56          | 1.21       | 26.4                   |

256 Legend: Abbreviations LDL-c = low-density lipoprotein cholesterol; HDL-c = High density lipoprotein  
 257 cholesterol; TC= Total cholesterol; TG = Triglycerides; BMI = Body-Mass Index

258 **E) Example Calculation**

259 A male patient, medical history negative for diabetes, 40 years of age, BMI of 26.2 kg/m<sup>2</sup>, systolic  
260 blood-pressure 140 mmHg, and a total cholesterol / HDL ratio of 7. The 50<sup>th</sup> percentile values for  
261 HDL-c is 1.12 mmol/L and TG is 1.35 mmol/L.(1)

262 Calculation LDL-c:

263 Baseline LDL-c = Total cholesterol – median HDL – median triglyceride / 2.17

264 = Ratio x median HDL – median HDL – median triglyceride / 2.17

265 = 7 x 1.12 – 1.12 – 1.35/2.17

266 = 6.098 mmol/L

267 The effects of simvastatin 40 mg was calculated as follows:

268 LDL-c<sub>new</sub> = LDL-c<sub>old</sub> \* (1 - percent reduction)

269 = 6.098 mmol/L \* 0.63

270 = 3.842 mmol/L

271 Estimated attainable therapy-benefit in terms of gain in CVD-free life-years according to the JBS3

272 Online calculator:<sup>22</sup>

273 Calculated CVD-free life-expectancy off-treatment (i.e. current prognosis) = 76 years

274 Calculated gain in CVD-free life-expectancy = 2.5 years

275 Remaining CVD-free life years on-treatment (i.e. potential treatment duration) = (76 years +

276 2.5 years )-40 years(i.e. current age) = 38.5 years

277 Gain per 10 years of use = (2.5 years gain / 38.5 years of use)\*10 = 0.649 years = 7.8 months

278

279 **F) Supplemental Figures**

280

281 **Supplemental Figure 1.** Months gain in CVD-free life-expectancy required to consider personal use

282 of statin therapy, stratified by sex in physicians

283

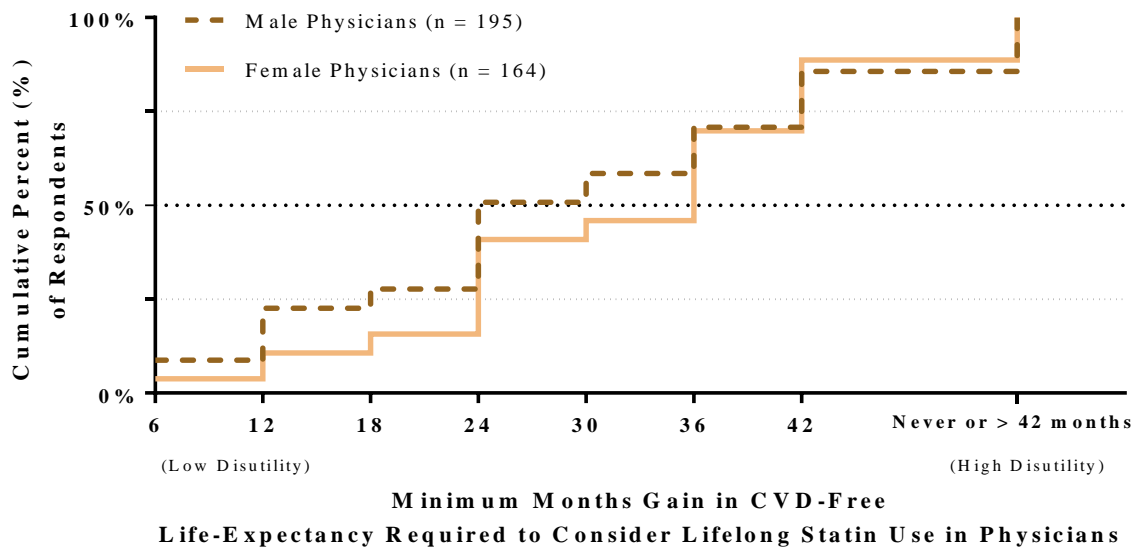

284

285 Legend: Months gain in CVD-free life-expectancy above which physicians perceive lifelong statin

286 therapy as meaningful, stratified by gender.

287

288

289

290

291

292

293 **Supplemental Figure 2.** Months gain in CVD-free life-expectancy required to consider personal use  
 294 of statin therapy, stratified by sex in patients

295

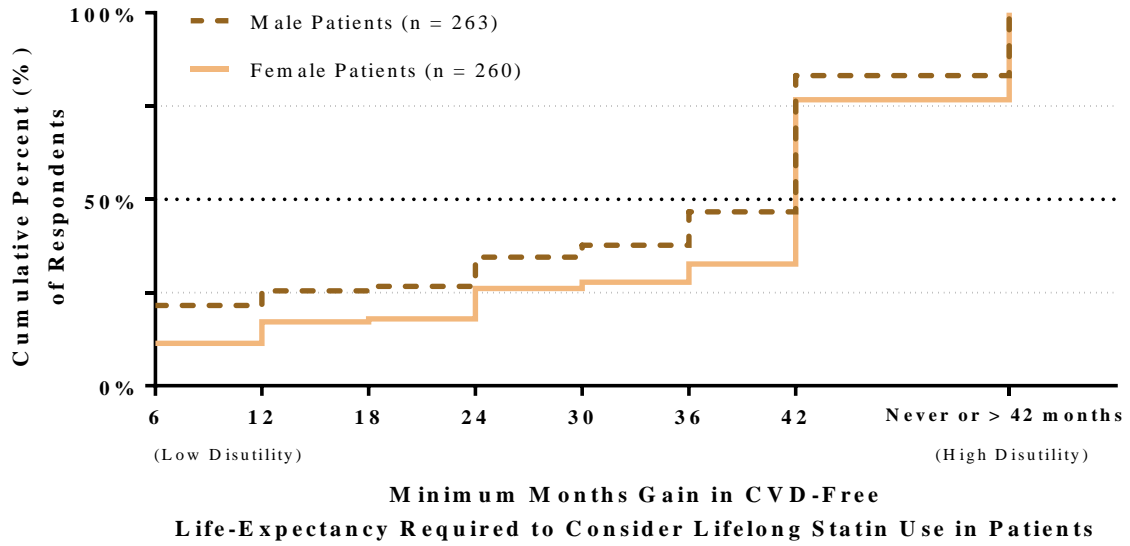

296  
 297

298 Legend: Months gain in CVD-free life-expectancy above which patients perceive lifelong statin  
 299 therapy as meaningful, stratified by gender.

300

301

302

303 **Supplemental Figure 3.** Months gain in CVD-free life-expectancy required to consider personal use  
 304 of statin therapy in patients, stratified by medical history of CVD in patients

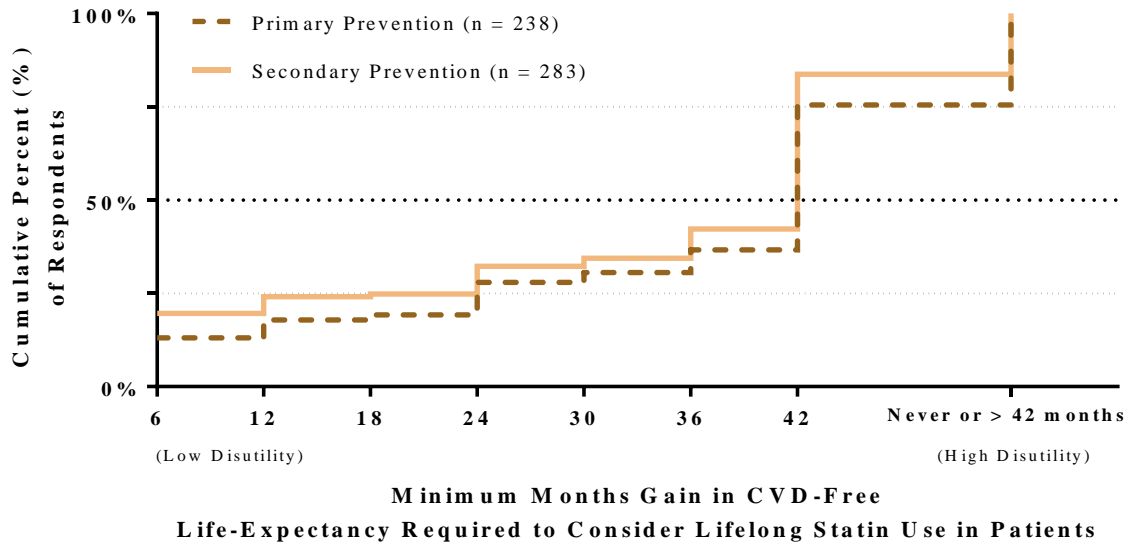

305  
 306

307 Legend: Months gain in CVD-free life-expectancy above which patients perceive lifelong statin  
 308 therapy as meaningful, stratified by presence of CVD.

309

310

311 **Supplemental Figure 4.** Months gain in CVD-free life-expectancy required to consider personal use  
 312 of statin therapy in patients, stratified by medication use in patients

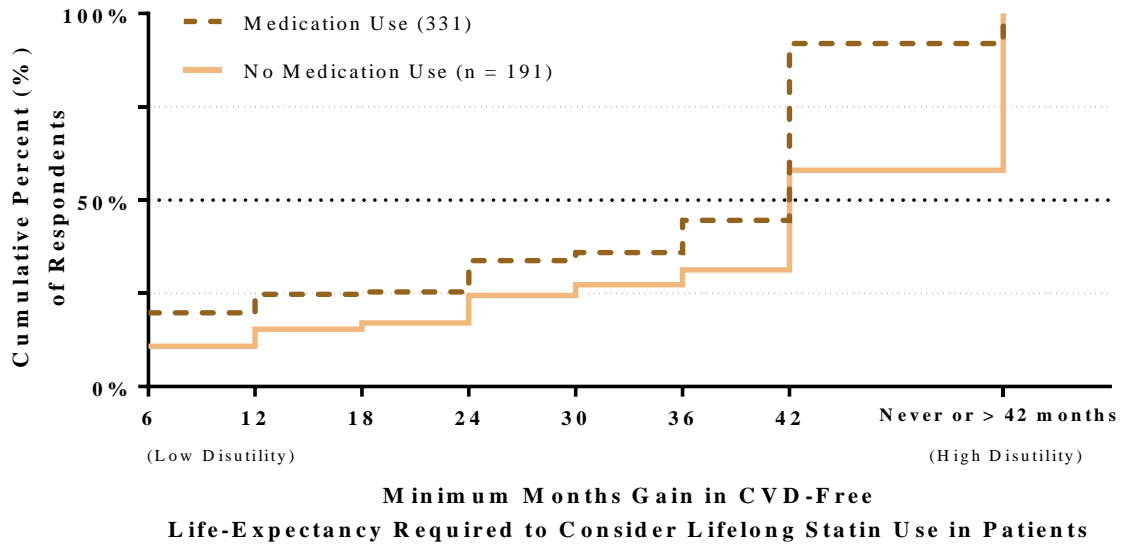

313  
 314

315 Legend: Months gain in CVD-free life-expectancy above which patients perceive lifelong statin  
 316 therapy as meaningful, stratified by use of either statin or antihypertensive medication.

317

318

319

320

321

322

323



324 **Supplemental Figure 5.** Years willing use statin therapy for a one year gain in CVD-free life-  
 325 expectancy

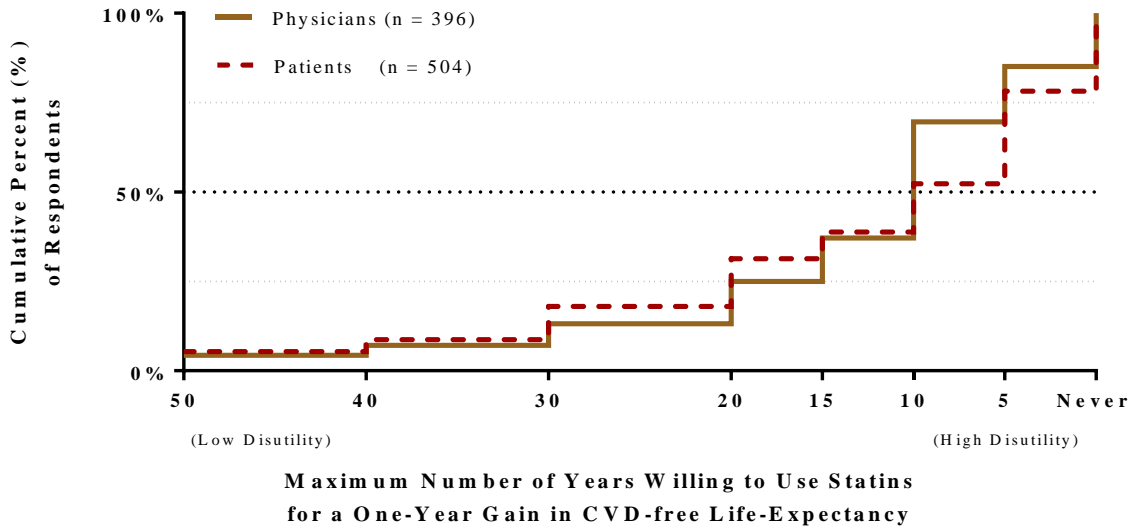

326

327 Legend: Maximum number of years patients and physicians would be willing to take statin  
 328 medication (for personal use). Results were similar to main analysis. In total, 14.2% of physicians  
 329 were unwilling to use a statin provided the thresholds. Comparatively, 21.5% of patients were  
 330 unwilling to use a statin provided the thresholds. For those willing to consider therapy, physicians  
 331 reported a median of 10 years (IQR 10-20), and patients reported a median of 10 years (IQR 5-20).
